# Supplementary material
Source: publisher site journal article supplement (https://spandidos-publications.com/563/downloadSupplementary)

Figure S1. Cell cycle analysis of culture cells. The population profile, DNA content profile and percentage of cells at each cell cycle of (A) HCT116/p, (B) DLD-1/p, (C) SW480/p, (D) HCT116/5fu. Data of untreated and 5FU-treated cells were shown.

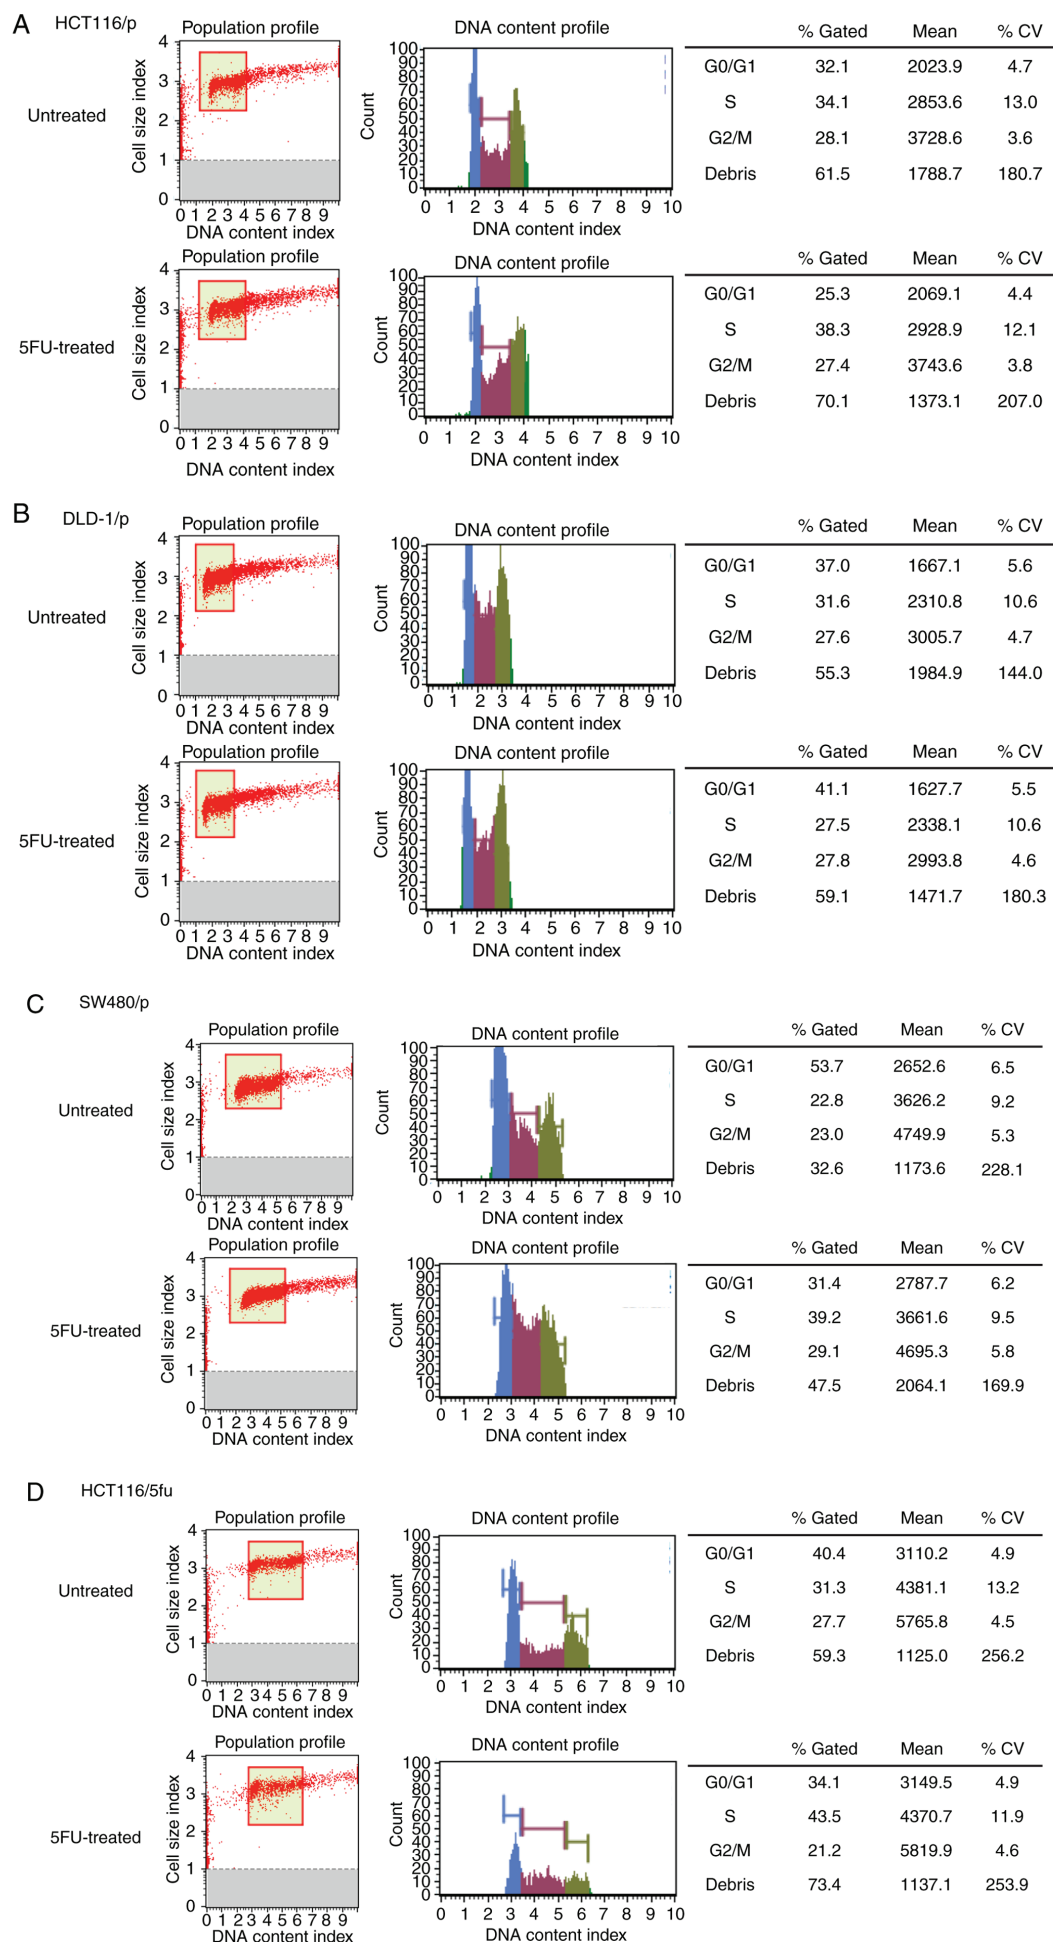

Figure S1. Continued. Cell cycle analysis of culture cells. The population profile, DNA content profile and percentage of cells at each cell cycle of (E) DLD-1/5fu and (F) SW480/5fu. Data of untreated and 5FU-treated cells were shown. 5FU, 5-fluorouracil.

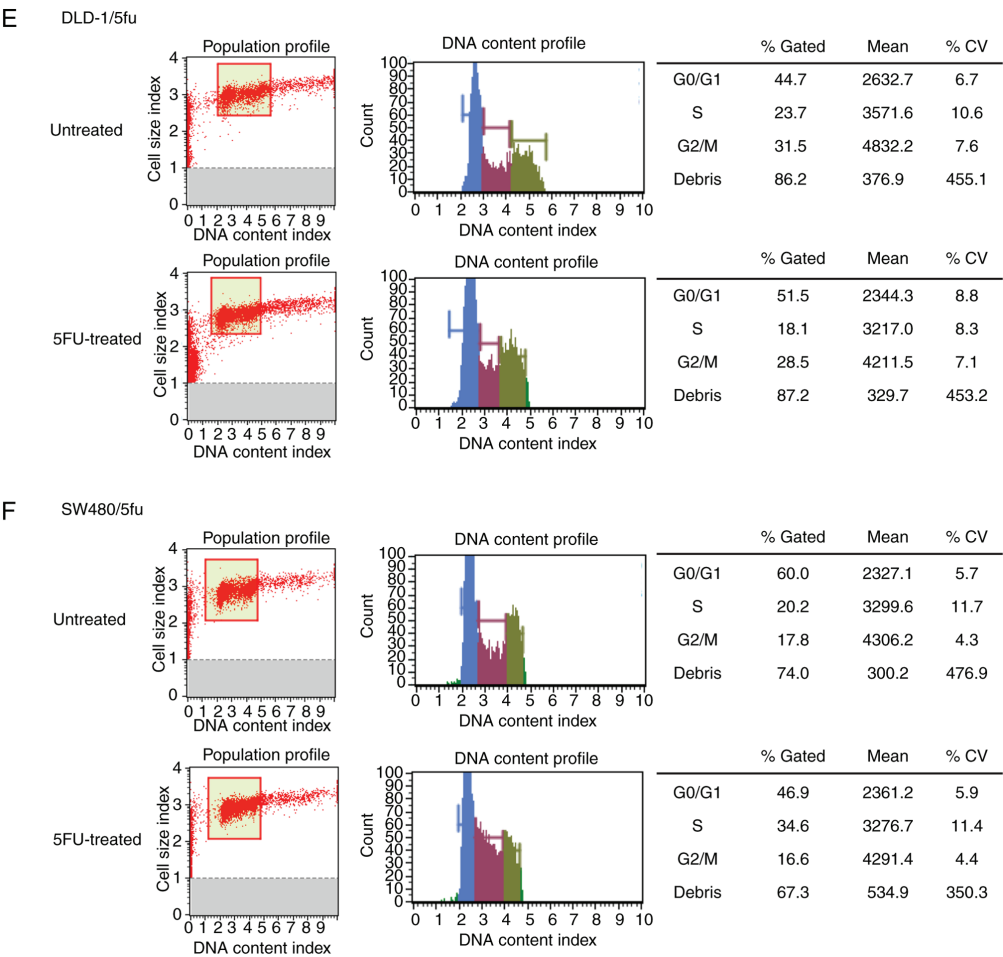

Supplement: Supplementary file 1 [file downloadSupplementary]
